# Supplementary material for: Understanding the crystal structure-dependent electrochemical capacitance of spinel and rock-salt Ni–Co oxides via density function theory calculations
Source: Royal Society of Chemistry journal article supplement (doi:10.1039/d0ra05578f), 2020-01-01
Supplement: d0ra05578f1.pdf [file d0ra05578f1.pdf]

## Electronic Supporting Information

### **Understanding the crystal structure-dependent electrochemical capacitance of spinel and rock-salt Ni-Co oxides via density function theory calculations**

Xuan Sun, Jinfeng Sun, Lingzhi Guo, Linrui Hou,\* Changzhou Yuan\*

School of Materials Science & Engineering, University of Jinan, Jinan, 250022, P. R.

China

#### **Corresponding authors**

**E-mail:** mse\_houlr@ujn.edu.cn (*Prof. L. R. Hou*)

mse\_yuancz@ujn.edu.cn; ayuancz@163.com (*Prof. C. Z. Yuan*)

## **1. Experimental methods**

### **1.1 Sample preparation**

The sample of NiCoO<sub>2</sub> was synthesized according to our previous work.<sup>1</sup> Typically, 1.5 mmol of Ni(NO<sub>3</sub>)<sub>2</sub>·6H<sub>2</sub>O, 1.5 mmol of Co(NO<sub>3</sub>)<sub>2</sub>·6H<sub>2</sub>O and 15 mmol of urea were dispersed in 40 mL of ethanol and stirred with magnetic stirrer to obtain a clear solution. Then, the resulting solution was poured into Teflon-lined stainless steel autoclave (50 mL in volume), then reserved at 100 °C for 8 h. After completion of the reaction, the obtained NiCoO<sub>2</sub>-precursor was collected by centrifuge and washed thoroughly then dried at 60 °C for 12 h. Finally, the rock-salt NiCoO<sub>2</sub> was obtained by calcinating the NiCoO<sub>2</sub>-precursor at 300 °C in N<sub>2</sub> atmosphere for 3 h with a heating rate of 1 °C min<sup>-1</sup>. The precursor of NiCo<sub>2</sub>O<sub>4</sub> sample was prepared at 1 mmol of Ni(NO<sub>3</sub>)<sub>2</sub>·6H<sub>2</sub>O, 2 mmol of Co(NO<sub>3</sub>)<sub>2</sub>·6H<sub>2</sub>O following the above method. Then the NiCo<sub>2</sub>O<sub>4</sub>-precursor was annealed in air atmosphere to obtain spinel NiCo<sub>2</sub>O<sub>4</sub>, while other parameters were kept unchanged.

### **1.2 Materials Characterizations**

X-ray diffraction (XRD) patterns were recorded on a multipurpose XRD system with a Cu *K*<sub>α</sub> radiation (Rigaku Ultima IV, Japan) to examine crystalline phases. The morphologies and structures of the as-prepared electrode materials were characterized by field-emission scanning electron microscopy (FESEM, JEOL 6300F) and transmission electron microscopy (TEM, JEOL JEM 2100 system).

### **1.3 Electrochemical measurements**

The electrochemical performance of cyclic voltammetry (CV) and chronopotentiometry (CP) tests for the samples were all carried out on an electrochemical workstation (IVIUM, Netherlands), using a three-electrode system with a working electrode, a Pt foil counter electrode and a saturated calomel electrode (SCE) reference electrode in 2 M potassium hydroxide (KOH) aqueous solution at room temperature. The working electrodes were prepared by coating a piece of nickel foam (1 cm<sup>2</sup>) with the slurry containing the electroactive materials, acetylene black and polytetrafluoroethylene in a weight ratio of 5 : 2 : 1. For the electrochemical measurements, the mass loading of electroactive material in each electrode was 5.0 mg. The specific capacitance (SC) for the three-electrode configuration were calculated from the CP curves using  $SC = It/mV$ , where  $m$  (g) is the mass of electrode material,  $I$  (A g<sup>-1</sup>),  $t$  (s) and  $V$  (V) are current density, discharge time, and voltage range.

## Reference

- 1 Z. Wang, Z. Zhao, Y. Zhang, G. Pang, X. Sun, J. Zhang, L. Hou and C. Yuan, *J. Alloys and Compd.*, 2019, **779**, 81-90.

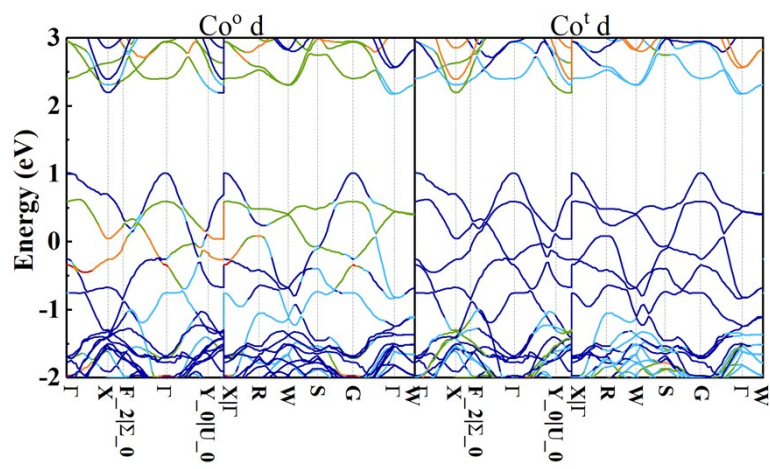

**Fig. S1** The contribution of  $d$ -orbital of all  $\text{Co}^0$  and  $\text{Co}^+$  atoms to the band structure near the Fermi-level in  $\text{NiCo}_2\text{O}_4$ . The energy zero is set at the Fermi-level.

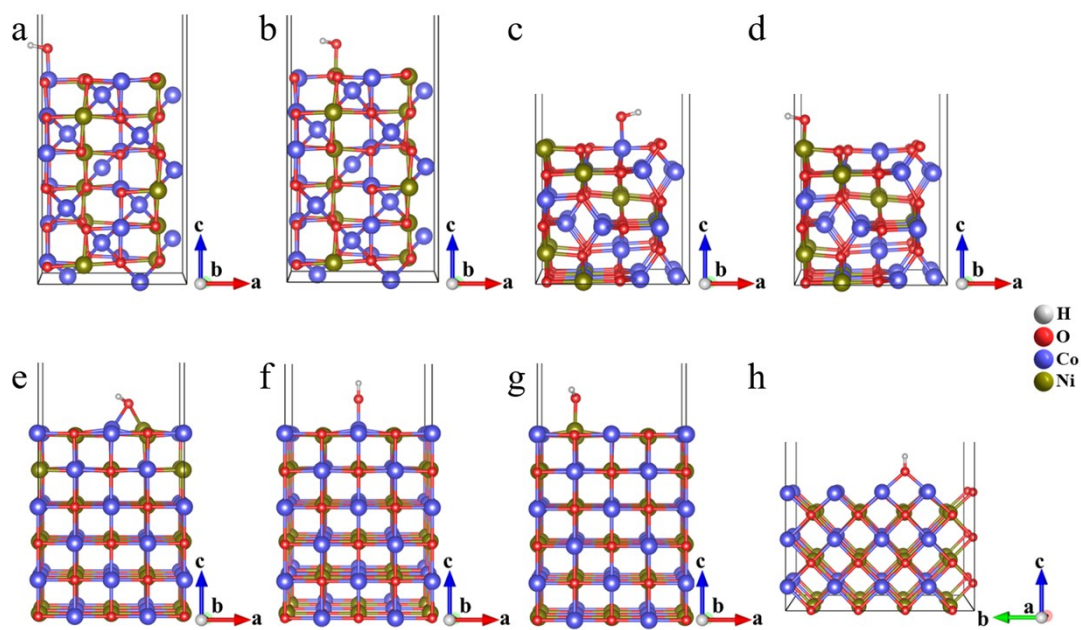

**Fig. S2** Configurations of the preferred hydroxyl adsorption on the top of (a) Co, (b) Ni in  $\text{NiCo}_2\text{O}_4(100)$ ; (c) Co, (d) Ni in  $\text{NiCo}_2\text{O}_4(110)$ ; (e) bridge between Ni and Co, top of (f) Co, (g) Ni in  $\text{NiCoO}_2(100)$  and (h) bridge between two Co atoms in  $\text{NiCoO}_2(110)$ .

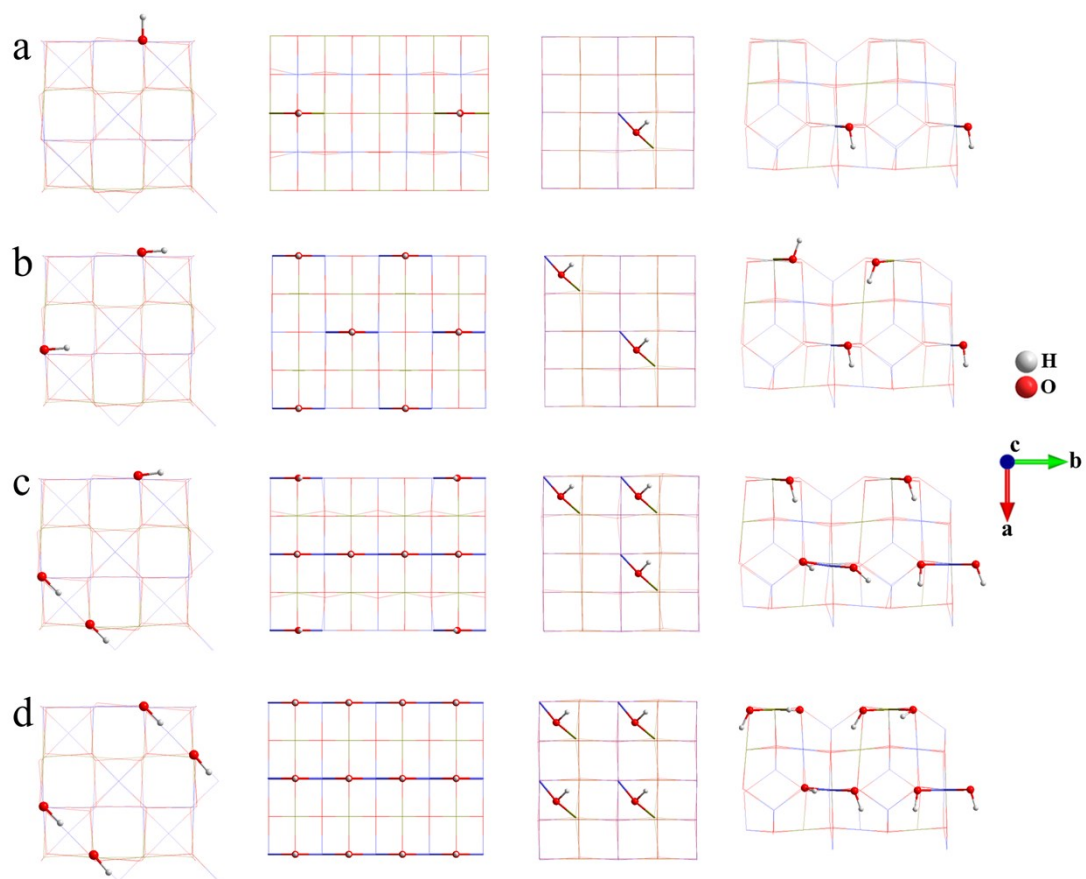

**Fig. S3** Configurations of the hydroxyl adsorption on the studied surfaces at (a) 25 %; (b) 50 %; (c) 75 % and (d) 100 % coverage.

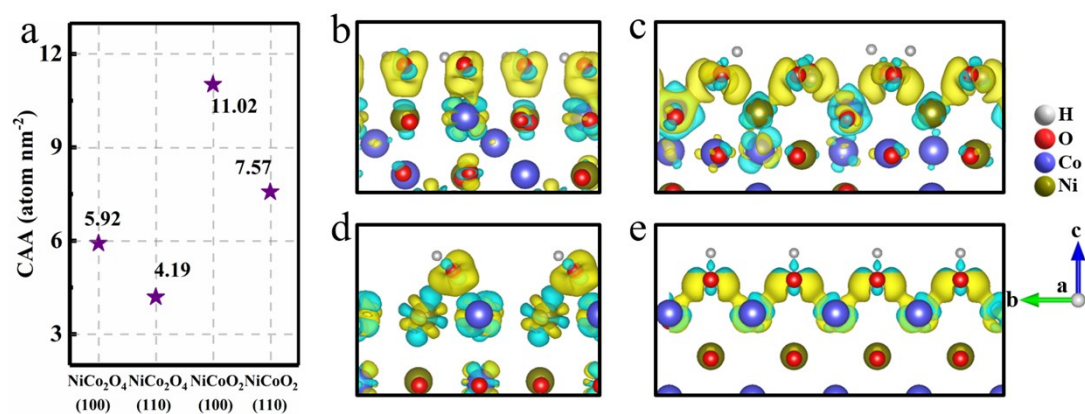

**Fig. S4** (a) The CAA of electroactive Ni/Co atoms for all the calculated surfaces. Charge density difference of (b) NiCo<sub>2</sub>O<sub>4</sub>(100), (c) NiCo<sub>2</sub>O<sub>4</sub>(110), (d) NiCoO<sub>2</sub>(100) and (e) NiCoO<sub>2</sub>(110) before and after hydroxyl adsorption (Isosurface=0.01 e/Å<sup>3</sup>). Yellow and blue represent electron accumulation and depletion, respectively.

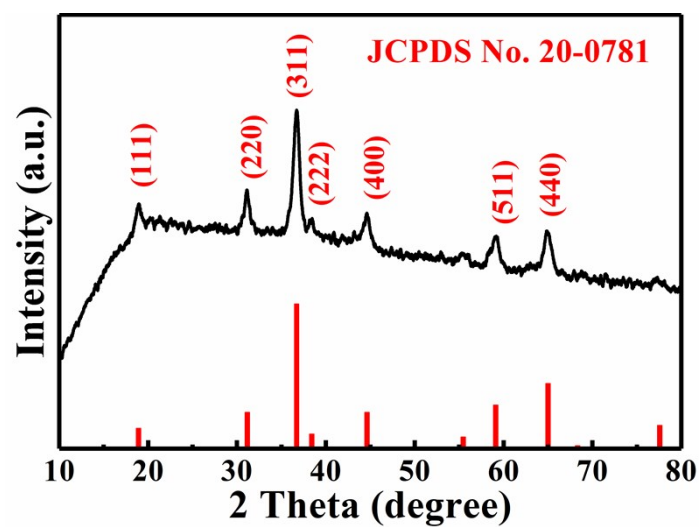

**Fig. S5** XRD patterns of the NiCo<sub>2</sub>O<sub>4</sub>.

As shown in Fig. S5, the XRD analysis indicated that all peaks can be well indexed to the cubic NiCo<sub>2</sub>O<sub>4</sub> (JCPDS No. 20-0781) with spinel structure.



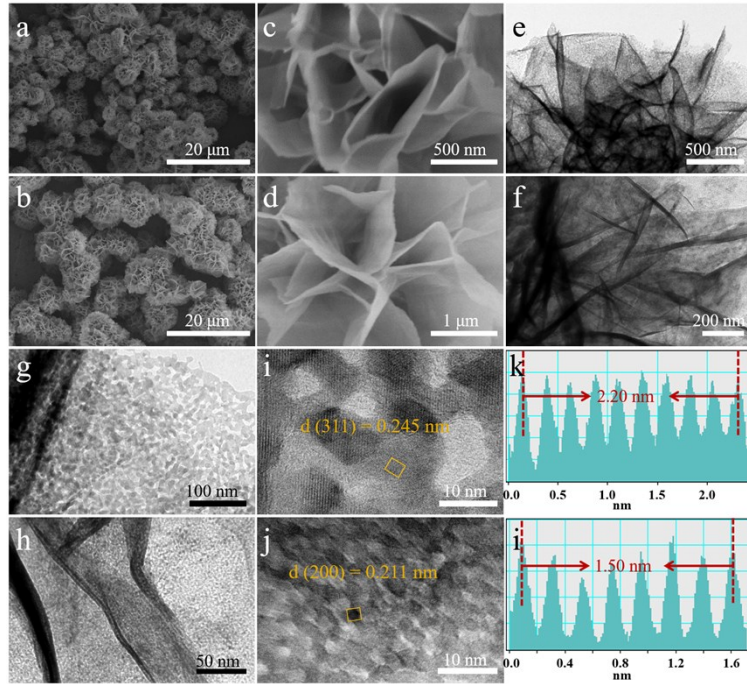

**Fig. S6** (a, b) Low and (c, d) high magnified FESEM images, (e, f) TEM and (g, h) high-magnification TEM, (i, j) HRTEM, (k, l) interplanar spacing of  $\text{NiCo}_2\text{O}_4$  and  $\text{NiCoO}_2$  respectively. The image in panels (k, l) are taken from the orange rectangle region in panels (i, j).

As shown in FESEM images with low-magnification (Fig. S6a-d), both the spinel  $\text{NiCo}_2\text{O}_4$  and rock-salt  $\text{NiCoO}_2$  samples exhibit the similar microflower morphology, which with homogeneous shape and average diameter of 3-4  $\mu\text{m}$ . The TEM images further demonstrate the similar morphology between  $\text{NiCo}_2\text{O}_4$  and  $\text{NiCoO}_2$ , which is formed by numerous continuous nanoparticles (Fig. S6e-j). HRTEM images (Fig. S6i, j) and corresponding analysis (Fig. S6i-l) demonstrate that the lattice fringes with an interplanar spacing of about 0.245 and 0.211 nm matched well with the (311) and (200) plane of  $\text{NiCo}_2\text{O}_4$  and  $\text{NiCoO}_2$ , respectively.

**Table S1** The calculated lattice constants of bulk phases and selected surfaces for the  $p(1\times 1)$  cell. The values taken from JCPDS no. 20-0781 for  $\text{NiCo}_2\text{O}_4$  and 10-0188 for  $\text{NiCoO}_2$  are included in parenthesis for comparison.

| Bulk/<br>Surface | $\text{NiCo}_2\text{O}_4$ | $\text{NiCoO}_2$ | $\text{NiCo}_2\text{O}_4$<br>(100) | $\text{NiCo}_2\text{O}_4$<br>(110) | $\text{NiCoO}_2$<br>(100) | $\text{NiCoO}_2$<br>(110) |
|------------------|---------------------------|------------------|------------------------------------|------------------------------------|---------------------------|---------------------------|
| a (Å)            | 8.22<br>(8.11)            | 4.26<br>(4.24)   | 8.22                               | 8.22                               | 4.26                      | 4.26                      |
| b (Å)            | 8.22<br>(8.11)            | 4.26<br>(4.24)   | 8.22                               | 11.62                              | 4.26                      | 6.02                      |
| c (Å)            | 8.22<br>(8.11)            | 4.26<br>(4.24)   | /                                  | /                                  | /                         | /                         |
